# Supplementary material for: Amid the possible causes of a very famous foxing: molecular and microscopic insight into Leonardo da Vinci's self‐portrait
Source: PubMed Central journal article supplement (PMC4959533; doi:10.1111/1758-2229.12313), 2015-08-19

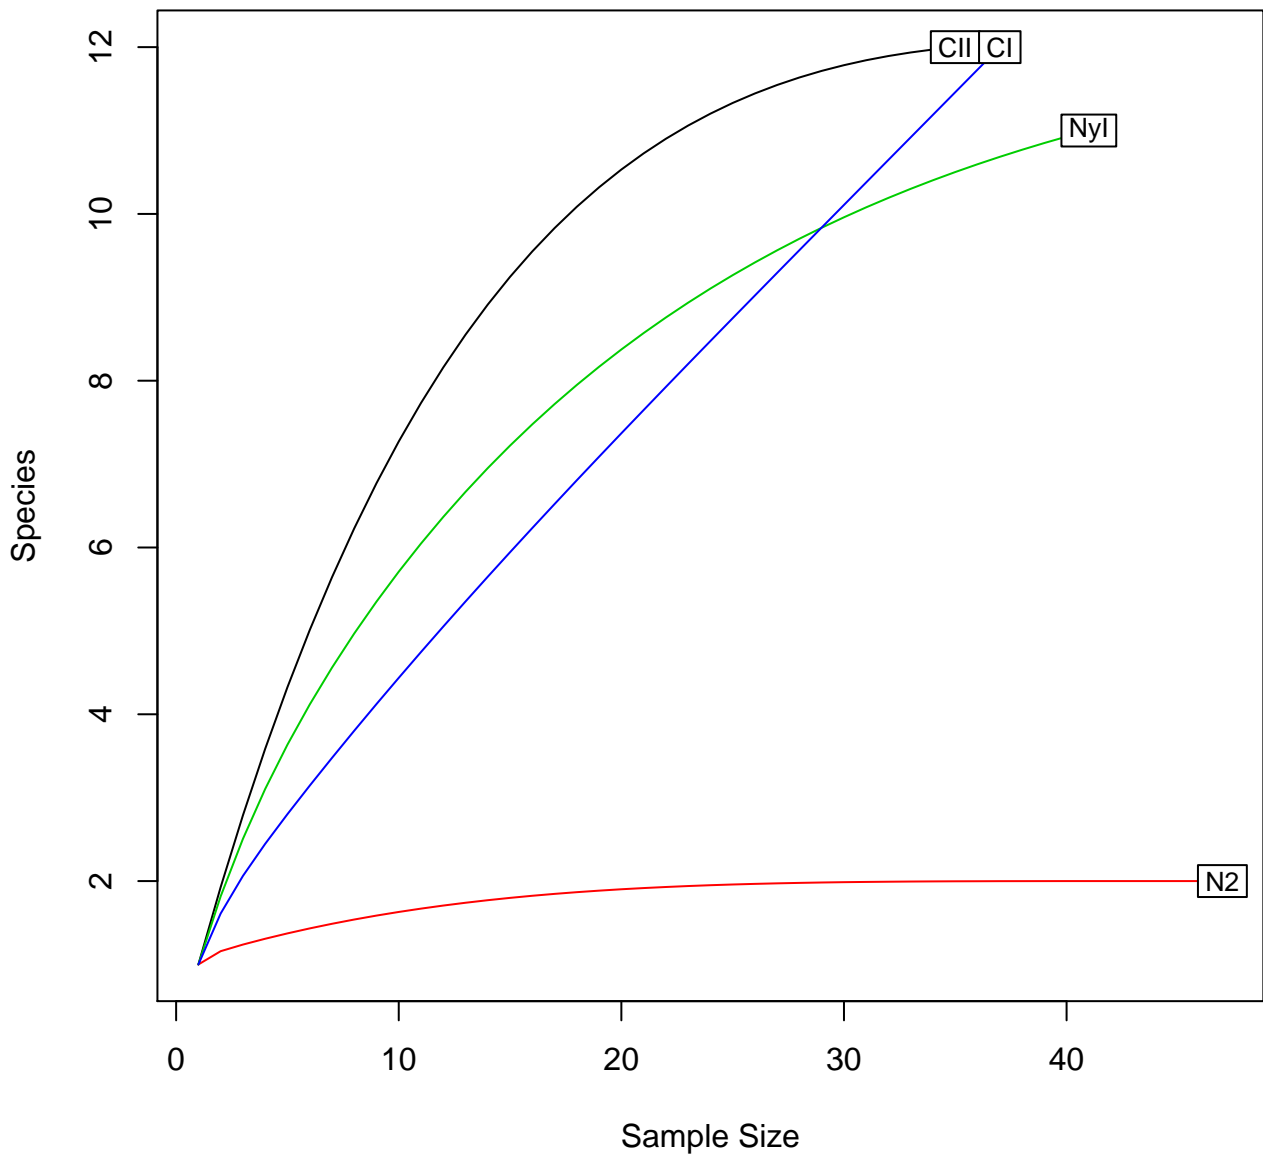

Supplement: EMI4-7-849-s003.pdf [file EMI4-7-849-s003.pdf]
